# Supplementary material
Source: PubMed Central journal article supplement (PMC4975636)
Supplement: NIHMS797303-supplement-308342R2_Acknowledgment_Permissions.pdf [file NIHMS797303-supplement-308342R2_Acknowledgment_Permissions.pdf]

## Circulation Research

---

**From:** Mark Conaway <mrc6j@eservices.virginia.edu>  
**Sent:** Wednesday, June 15, 2016 1:58 PM  
**To:** circulation.research@circresearch.com  
**Subject:** permission

Dear Circulation Research:

With this email, I am stating my permission to be acknowledged for assistance with statistical analyses in the manuscript "AT2 RECEPTOR ACTIVATION PREVENTS SODIUM RETENTION AND REDUCES BLOOD PRESSURE IN ANGIOTENSIN II-DEPENDENT HYPERTENSION". Author: Dr. Robert Carey

Sincerely

Mark Conaway

Mark Conaway, PhD  
Professor

Division of Translational Research and Applied Statistics Department of Public Health Sciences The University of Virginia Health System Charlottesville VA 22908

## Circulation Research

---

**From:** Aronson, Peter <peter.aronson@yale.edu>  
**Sent:** Wednesday, June 15, 2016 1:24 PM  
**To:** circulation.research@circresearch.com  
**Cc:** Kemp, Brandon Ambrose (bak4f)  
**Subject:** Fwd: permission to acknowledge you in our latest paper

Hello,

I give permission to be acknowledged in the paper mentioned below.

Thanks,  
Peter Aronson

--

Section of Nephrology  
Department of Medicine  
Yale School of Medicine  
1 Gilbert Street, TAC S-255  
P.O. Box 208029  
New Haven, CT 06520-8029

phone: 203-785-4902

fax: 203-785-3756

email: [peter.aronson@yale.edu](mailto:peter.aronson@yale.edu)

Begin forwarded message:

**From:** "Kemp, Brandon Ambrose (bak4f)" <[bak4f@eservices.virginia.edu](mailto:bak4f@eservices.virginia.edu)>  
**Subject:** permission to acknowledge you in our latest paper  
**Date:** June 15, 2016 at 12:56:09 PM EDT  
**To:** "[peter.aronson@yale.edu](mailto:peter.aronson@yale.edu)" <[peter.aronson@yale.edu](mailto:peter.aronson@yale.edu)>

Dear Dr. Aronson,

We are in the process of publishing a paper in Circulation Research and we acknowledged you in the manuscript for your extreme generosity of sending our lab some of your NHE-3 antibody. Would you be kind enough to send an email to [circulation.research@circresearch.com](mailto:circulation.research@circresearch.com) citing your permission to be acknowledged in our manuscript titled "AT2 RECEPTOR ACTIVATION PREVENTS SODIUM RETENTION AND REDUCES BLOOD PRESSURE IN ANGIOTENSIN II-DEPENDENT HYPERTENSION"? If you have any questions please feel free to contact me. Thank you again for your help with our research. Take care!

Brandon Ambrose Kemp  
Laboratory Research Specialist III
